# Supplementary material for: Influence of cirrhosis on outcomes of patients with advanced intrahepatic cholangiocarcinoma receiving chemotherapy
Source: Springer Nature journal article supplement (doi:10.1038/s41416-023-02460-2), 2023-10-09
Supplement: MOESM1 [file 41416_2023_2460_MOESM1_ESM.pdf]

Figures :

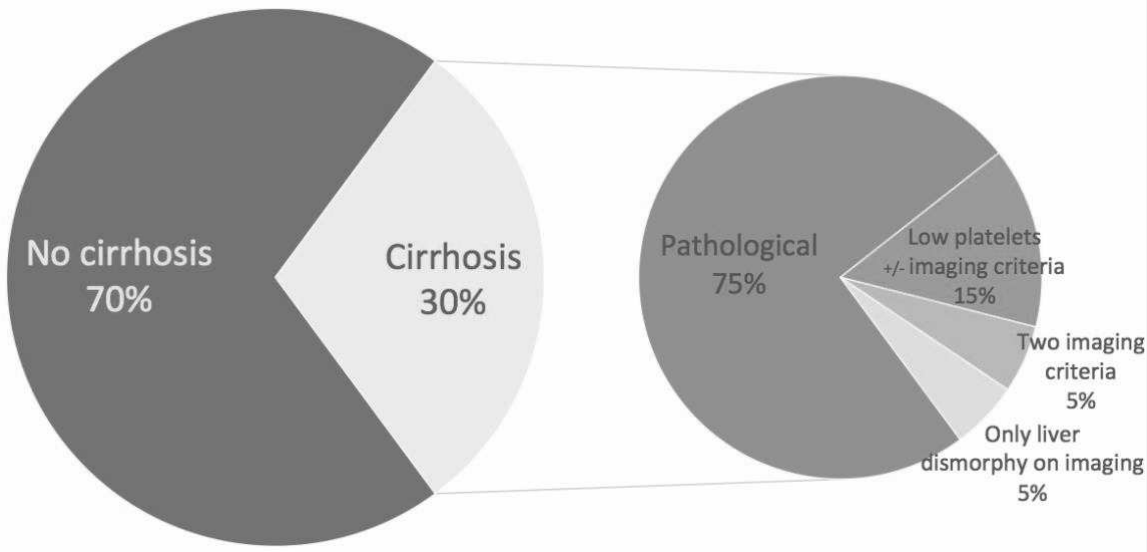

Figure 1A. Description of the population in the first cohort

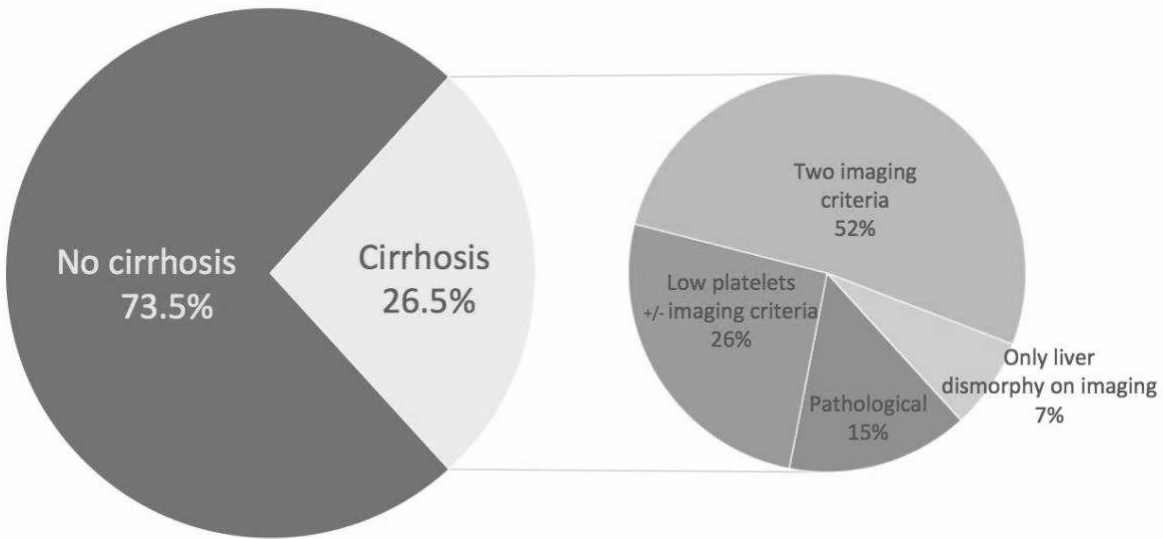

Figure 1B. Description of the population in the validation cohort

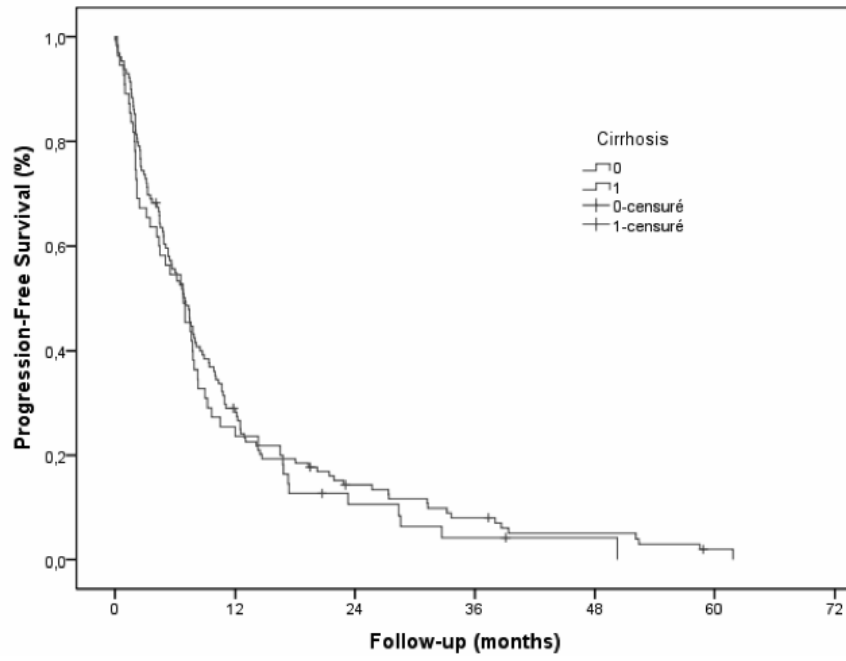

Figure 2A: Kaplan Meier PFS by cirrhosis in the first cohort

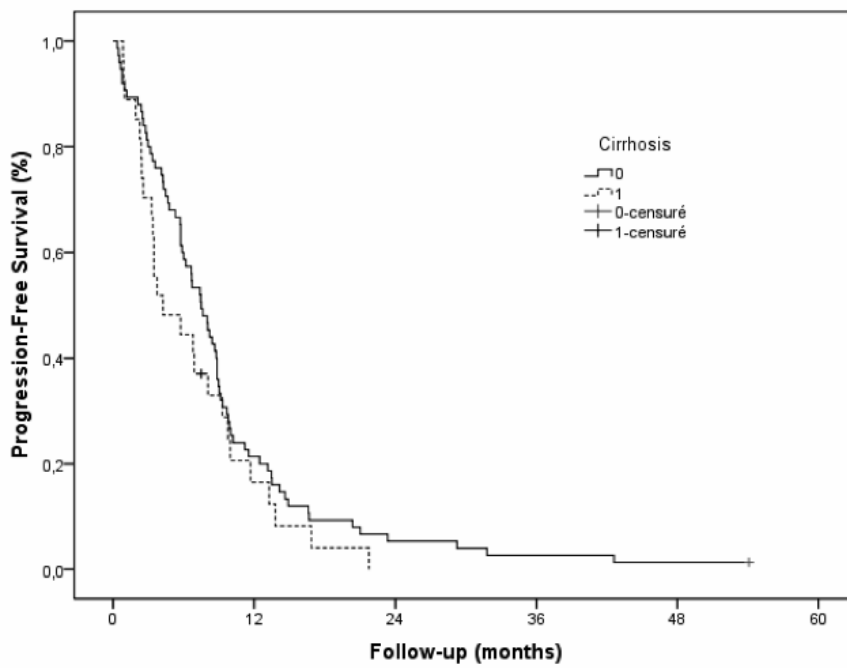

Figure 2B: Kaplan Meier PFS by cirrhosis in the validation cohort

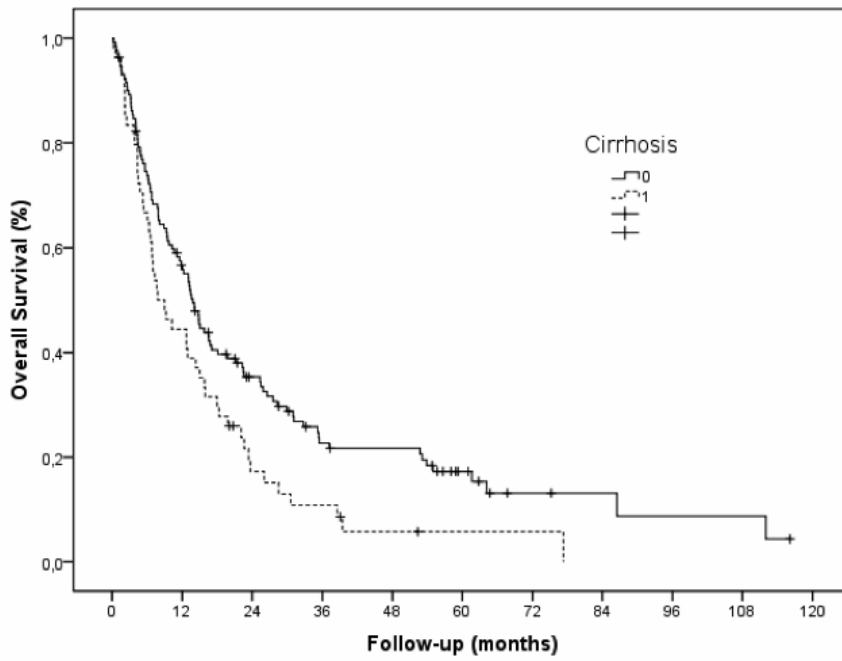

Figure 3A: Kaplan Meier OS by cirrhosis in the first cohort

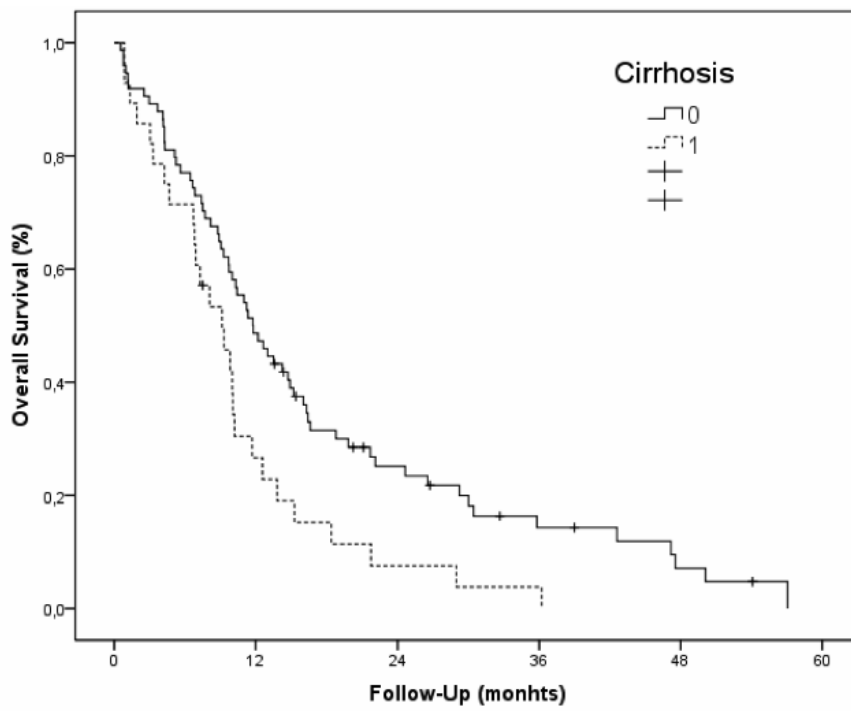

Figure 3B: Kaplan Meier OS by cirrhosis in the validation cohort

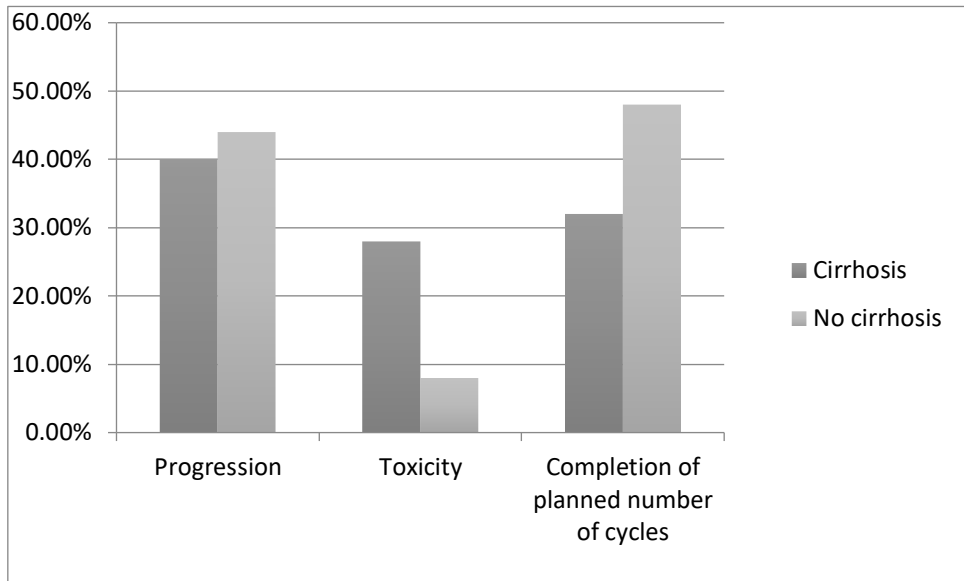

Figure 4a. Causes of discontinuation of chemotherapy in first cohort

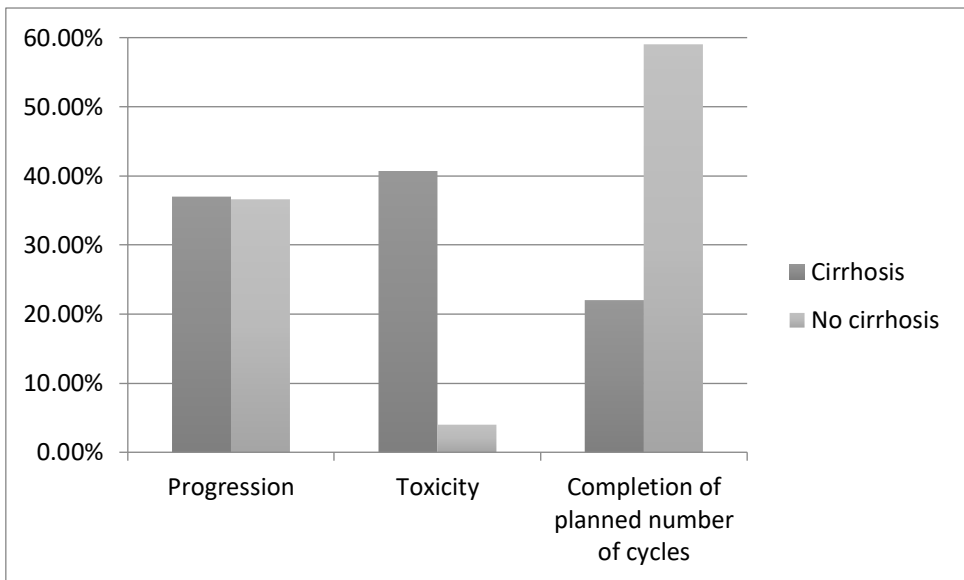

Figure 4b. Causes of discontinuation of chemotherapy in validation cohort
